# Supplementary material for: Virtual mapping and analytical data integration: a teaching module using Precambrian crystalline basement in Colorado's Front Range (USA)
Source: Copernicus journal article supplement (doi:10.5194/gc-4-421-2021), 2021-09-28
Supplement: Supplementary file [file gc-4-421-2021-supplement-title-page.pdf › gc-4-421-2021-supplement-title-page.pdf]

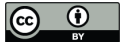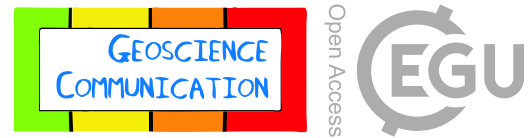

## *Supplement of*

# **Virtual mapping and analytical data integration: a teaching module using Precambrian crystalline basement in Colorado's Front Range (USA)**

**Kevin H. Mahan et al.**

*Correspondence to:* Kevin H. Mahan ([kevin.mahan@colorado.edu](mailto:kevin.mahan@colorado.edu))

- gc-4-421-2021-supplement-title-page.pdf
- Supplement Materials described in Appendix A1
  - .DS\_Store
  - GGBasemap.pptx
  - GGmapsstereonetsummaries.pdf
  - GGstationdescriptions.zip
  - GGstationlocations.zip
  - InstructionsStraboSpot.docx
  - IntroGGmapunits.pptx
  - Preassessment.docx
  - StationRequestForm.docx
- Supplement Materials described in Appendix A2
  - .DS\_Store
  - ConcordiaDiagram.xlsx
  - Dataset1AdvancedStructure.docx
  - Dataset2Microstructure.docx
  - Dataset3MetamorphicPetrology.docx
  - Dataset4MetamorphicMonazite.docx
  - Dataset5IgneousZircon.docx
  - Dataset6DetritalZircon.docx
  - GoldenGatefielddata.xlsx
  - Introanalyticaldatasets.pptx
  - Introductionanalyticaldatasets.docx
  - JonesThrane12Appendix1DZdata.xlsx

- McCoy01mnzISRsz.xlsx
  - PremoandFanning2000data.xlsx
  - U-Th-Pb basics.pdf
  - Wardet2012ISRq.ctf
- Supplement Materials described in Appendix A3
  - Instructionsforfinalreport.docx

The copyright of individual parts of the supplement might differ from the article licence.
